# Supplementary material for: Integrins Can Act as Suppressors of Ras-Mediated Oncogenesis in the Drosophila Wing Disc Epithelium
Source: MDPI journal article supplement (doi:10.3390/cancers15225432), 2023-11-15
Supplement: s1 [file s1]

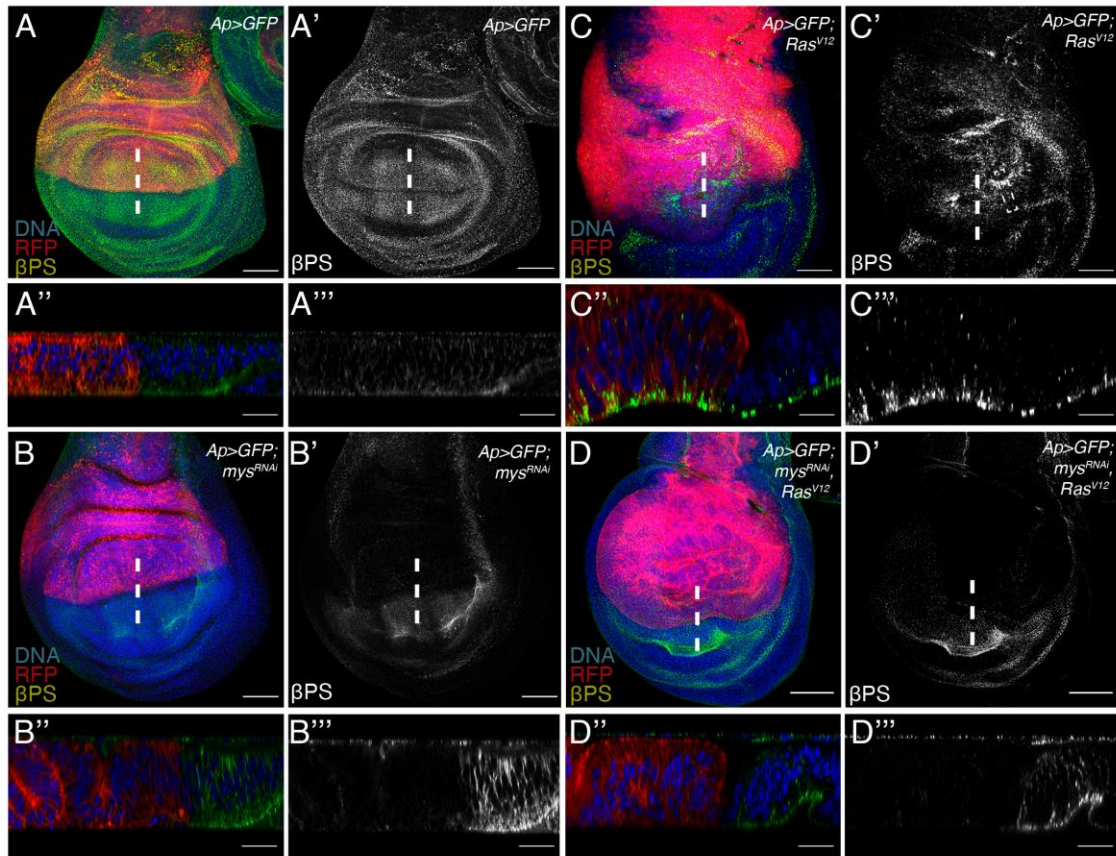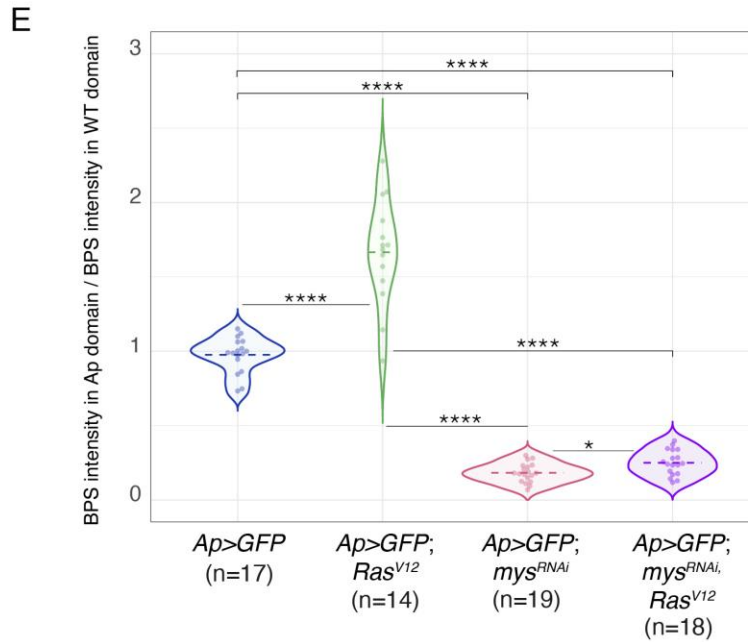

**Figure S1. Oncogenic *Ras<sup>V12</sup>* increase integrin expression levels in *Drosophila* wing disc epithelial cells.** (A-D) Maximal projection of confocal views of third-instar larvae wing discs of the indicated genotypes, stained with anti-RFP (red), anti-βPS (green in A-D and A''-D'', white in A'-D' and A'''-D''') and Hoechst (DNA, blue). (A''-D'') Confocal xz sections along the white dotted line shown in A-D'. (E) Violin plots of the intensity of βPS fluorescence in Apterous domain / intensity in the wild-type domain. The statistical significance of differences was assessed with a welch-test, \*\*\*\*, \* P values are <0.0001 and <0.05, respectively. Scale bars 50 μm (A-D') and 10 μm (A''-D''').

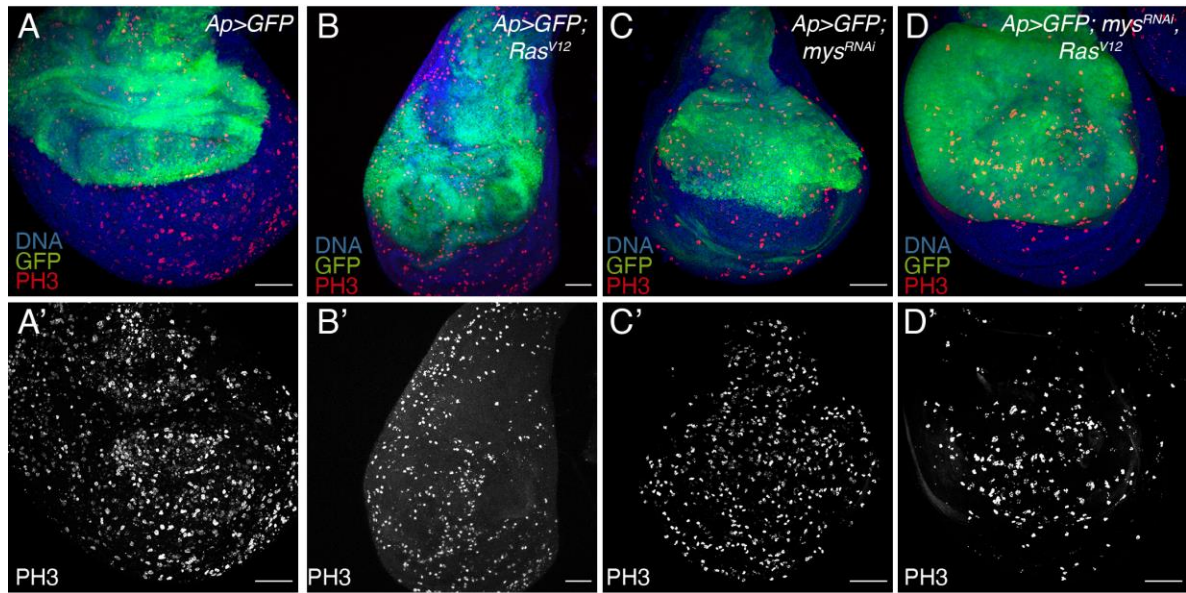

E

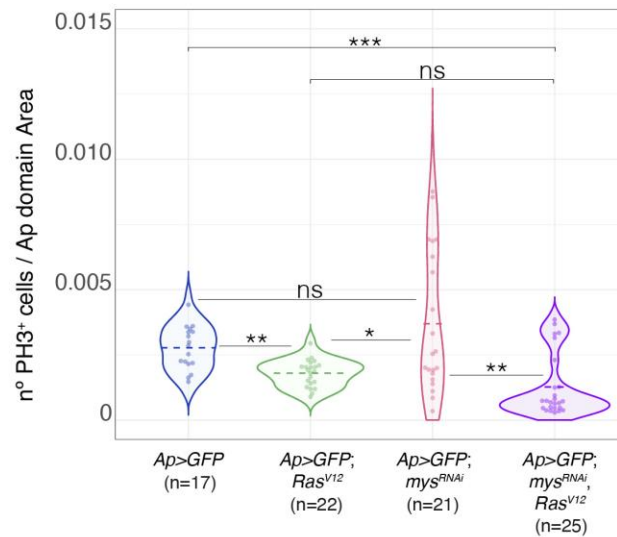

**Figure S2. Downregulation of integrins does not affect the proliferation of *Ras<sup>V12</sup>* tumoral cells.** (A-D') Maximal projection of confocal images of third-instar wing discs of the indicated genotypes, stained with anti-GFP (green), antibody against PH3 (red) and Hoechst (DNA, blue). (A'-D') Same disc only stained with anti-PH3 (grey). (E) Violin plots of number of PH3<sup>+</sup> cells/apterous domain area. The statistical significance of differences was assessed with a Welch-test, \*\*\*, \*\*, \* P values are <0.001, <0.01 and <0.05 respectively. Scale bars are 40 μm.

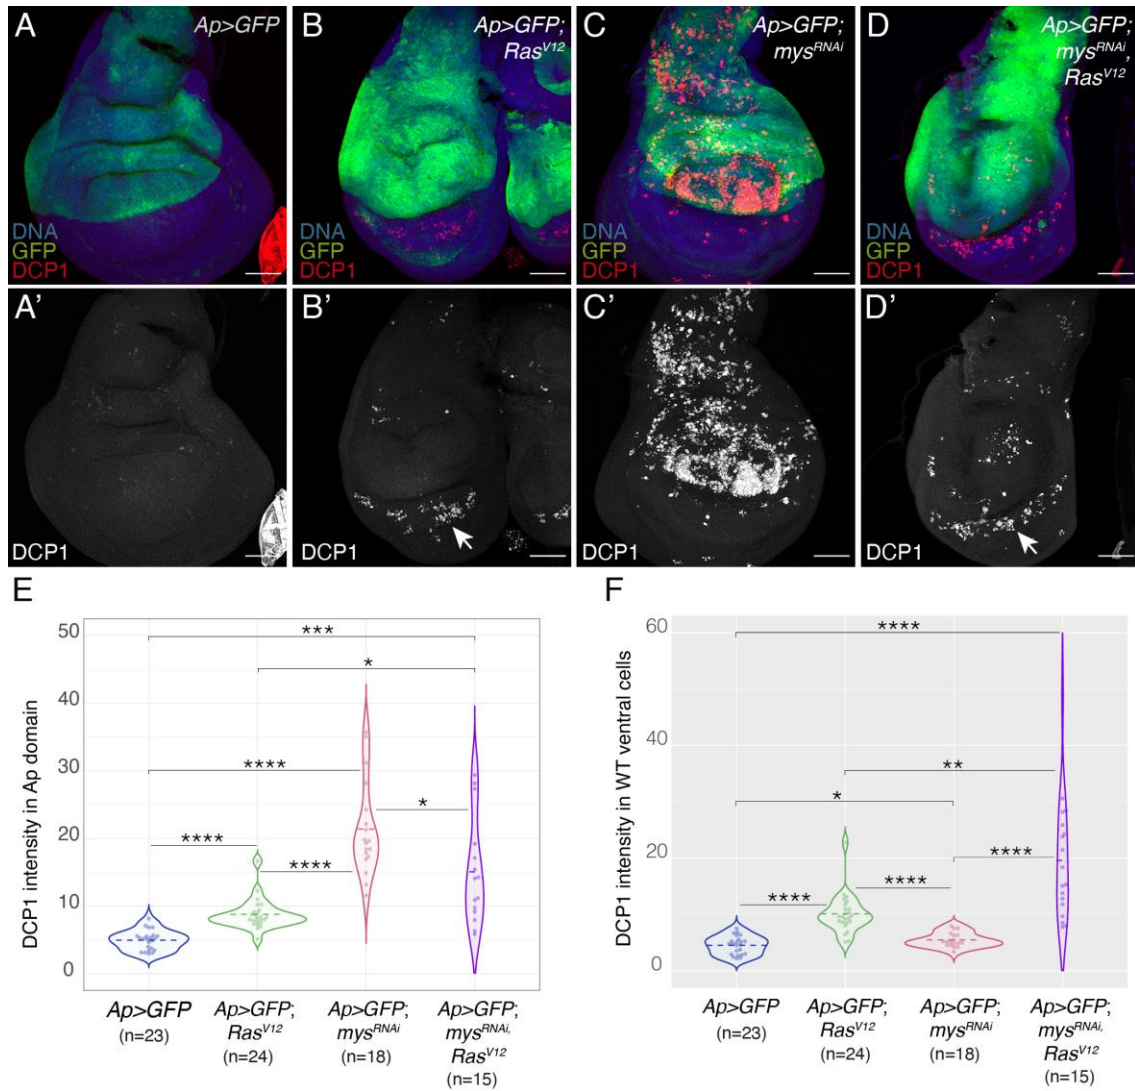

**Figure S3.** Downregulation of integrin expression increases the ability of *Ras*<sup>V12</sup> cells to induce the death of nearby wild-type cells. (A-D) Maximal projection of confocal images of third-instar larvae wing discs of the specified genotypes, stained with anti-GFP (green), anti-DCP1 (red in A-D, white in A'-D') and Hoechst (DNA, blue). (E, F) Violin plots of the mean fluorescent DCP1 intensity in the apterous (E) and ventral (F) domains. The statistical significance of differences was assessed with a welch-test, \*\*\*\*, \*\*\*, \*\*, \* P values are <0.0001, <0.001, <0.01 and <0.05 respectively. Scale bars are 40  $\mu$ m.

**Movies S1-5.** *In vivo* analysis of third instar cultured control *ap>GFP* (Movie 1), *ap>GFP; Ras*<sup>V12</sup> (Movie S2), *ap>GFP; mys*<sup>RNAi</sup> (Movie S3), *ap>GFP; mys*<sup>RNAi</sup>; *Ras*<sup>V12</sup> (Movie S4) and *ap>GFP; mys*<sup>RNAi</sup>; *hid*<sup>RNAi</sup> (Movie S5) wing discs.
